# Supplementary material
Source: publisher figshare collection journal article supplement (https://acs.figshare.com/ndownloader/files/4687249)
Supplement: Supplementary file 1 [file 4687249]

## Supporting Information

# Conductance Switching in an Organic Material: From Bulk to Monolayer

*Arup K. Rath and Amlan J. Pal\**

Indian Association for the Cultivation of Science, Department of Solid State Physics and  
Centre for Advanced Materials, Jadavpur, Kolkata 700032, India

E-mail: [sspajp@iacs.res.in](mailto:sspajp@iacs.res.in)

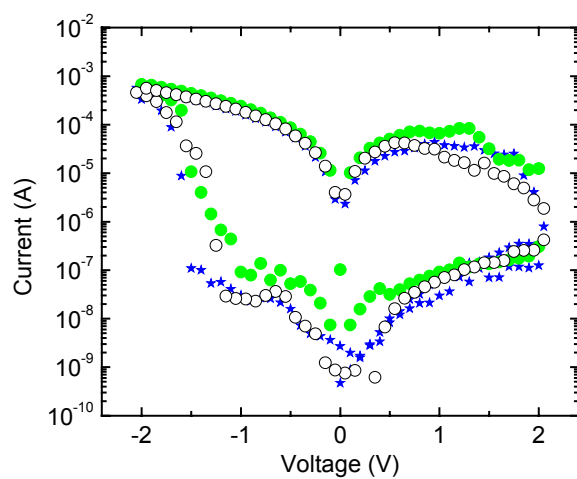

**Figure S1.**  $I$ - $V$  characteristics of three devices based on fluorescein sodium:CNT (10 wt%) as represented by three different symbols.

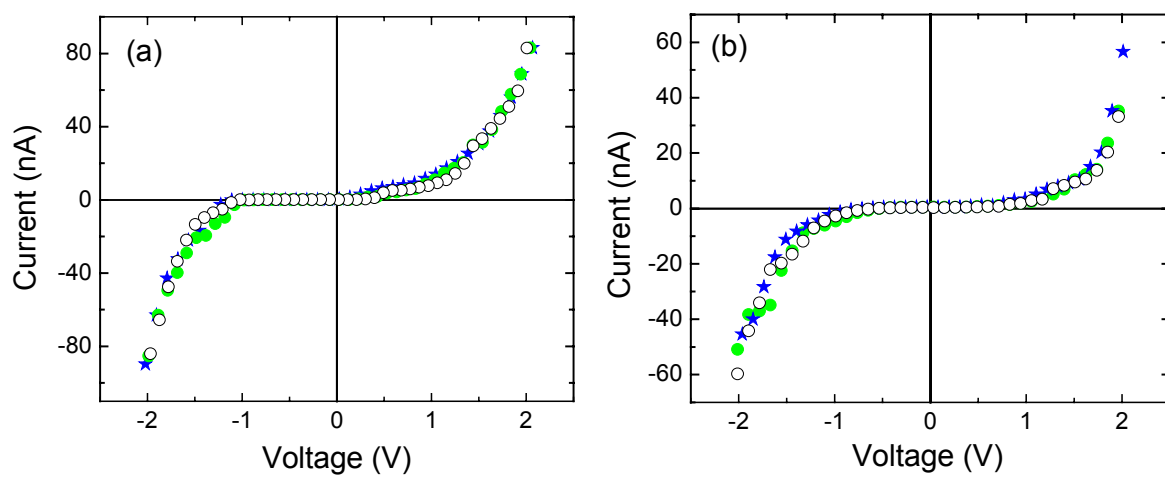

**Figure S2.**  $I$ - $V$  characteristics with a STM tip of (a) native  $\text{SiO}_2$  on Si and (b) monolayer of PAH at three different points.
